# Supplementary material
Source: PubMed Central journal article supplement (PMC2529078)
Supplement: 0803618105_0803618105SI.pdf [file 0803618105_0803618105SI.pdf]

# Supporting Information

Zeevi et al. 10.1073/pnas.0803618105

Table S1. Recognition helices for ZFN10, ZFN11, ZFN-H2a, and ZFN-H2b

|         | Target (5' → 3') | Recognition helix I | Recognition helix II | Recognition helix III |
|---------|------------------|---------------------|----------------------|-----------------------|
| ZFN10   | ATGGATGCA        | QSGDLRR (1)         | TSGNLVR (1)          | RRDELNV (2)           |
| ZFN11   | TTGTGGGAA        | QSSNLQK (3)         | RSDHLTT (4)          | RSDSLTK (5)           |
| ZFN-H2a | GTTGGTGCT        | QSSDLTR (6)         | TSGHLVR (1)          | TSGSLVR (1)           |
| ZFN-H2b | GCTGCTGTC        | DRSALAR (6)         | QSSDLTR (6)          | QSSDLTR (6)           |

References are in parentheses.

1. Dreier B, Segal DJ, Barbas CF, III (2000) Insights into the molecular recognition of the 5'-GNN-3' family of DNA sequences by zinc finger domains. *J Mol Biol* 303:489–502.
2. Dreier B, Beerli RR, Segal DJ, Flippin JD, Barbas CF, III (2001) Development of zinc finger domains for recognition of the 5'-ANN-3' family of DNA sequences and their use in the construction of artificial transcription factors. *J Biol Chem* 276:29466–29478.
3. Kim YG, Shi Y, Berg JM, Chandrasegaran S (1997) Site-specific cleavage of DNA-RNA hybrids by zinc finger/FokI cleavage domain fusions. *Gene* 203:43–49.
4. Segal DJ, Dreier B, Beerli RR, Barbas CF, III (1999) Toward controlling gene expression at will: selection and design of zinc finger domains recognizing each of the 5'-GNN-3' DNA target sequences. *Proc Natl Acad Sci USA* 96:2758–2763.
5. Mani M, Kandavelou K, Dy FJ, Durai S, Chandrasegaran S (2005) Design, engineering, and characterization of zinc finger nucleases. *Biochem Biophys Res Commun* 335:447–457.
6. Liu Q, Xia Z, Zhong X, Case CC (2002) Validated zinc finger protein designs for all 16 GNN DNA triplet targets. *J Biol Chem* 277:3850–3856.
